# Supplementary material for: Pandemic precarity: COVID-19 is exposing and exacerbating inequalities in the American heartland
Source: PubMed Central journal article supplement — Proc Natl Acad Sci U S A. 2021 Feb 5;118(8):e2020685118. doi: 10.1073/pnas.2020685118 (PMC7923675; doi:10.1073/pnas.2020685118), 2021-02-05
Supplement: pnas.2020685118.sapp.pdf [file pnas.2020685118.sapp.pdf]

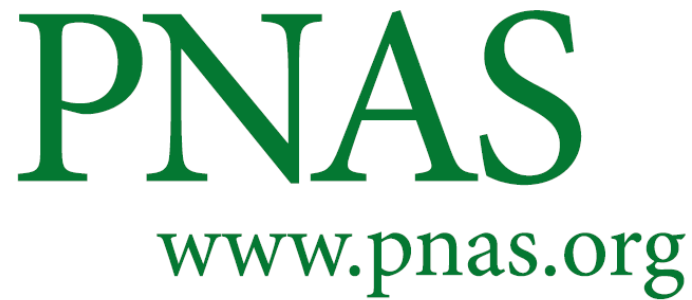

**Supplementary Information for**  
Pandemic Precarity: COVID-19 Is Exposing and Exacerbating  
Inequalities in The American Heartland

Brea L. Perry<sup>a</sup>  
Brian Aronson<sup>a</sup>  
Bernice A. Pescosolido<sup>a\*</sup>

<sup>a</sup> Department of Sociology, Indiana University, Bloomington, IN 47405

\* Bernice A. Pescosolido, Dept. of Sociology, Indiana University, Bloomington, IN  
47405

**Email:** [pescosol@indiana.edu](mailto:pescosol@indiana.edu)

**This PDF file includes:**

Supplementary text  
Figures S1 to Sx (not allowed for Brief Reports)  
Tables S1 to Sx (not allowed for Brief Reports)  
SI References

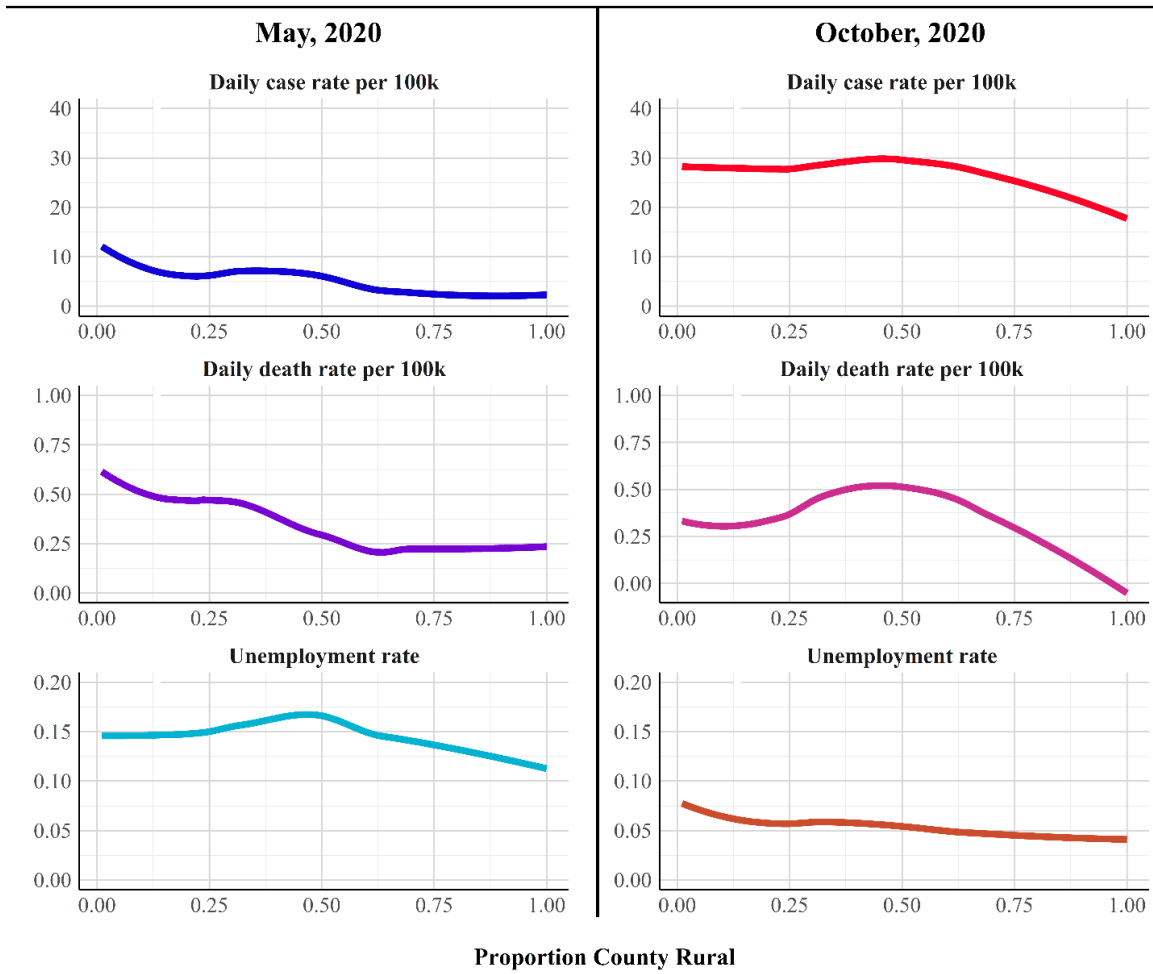

**Fig. S1.** Multivariate relationships between rurality and COVID-19 in Indiana during sample period and six months later

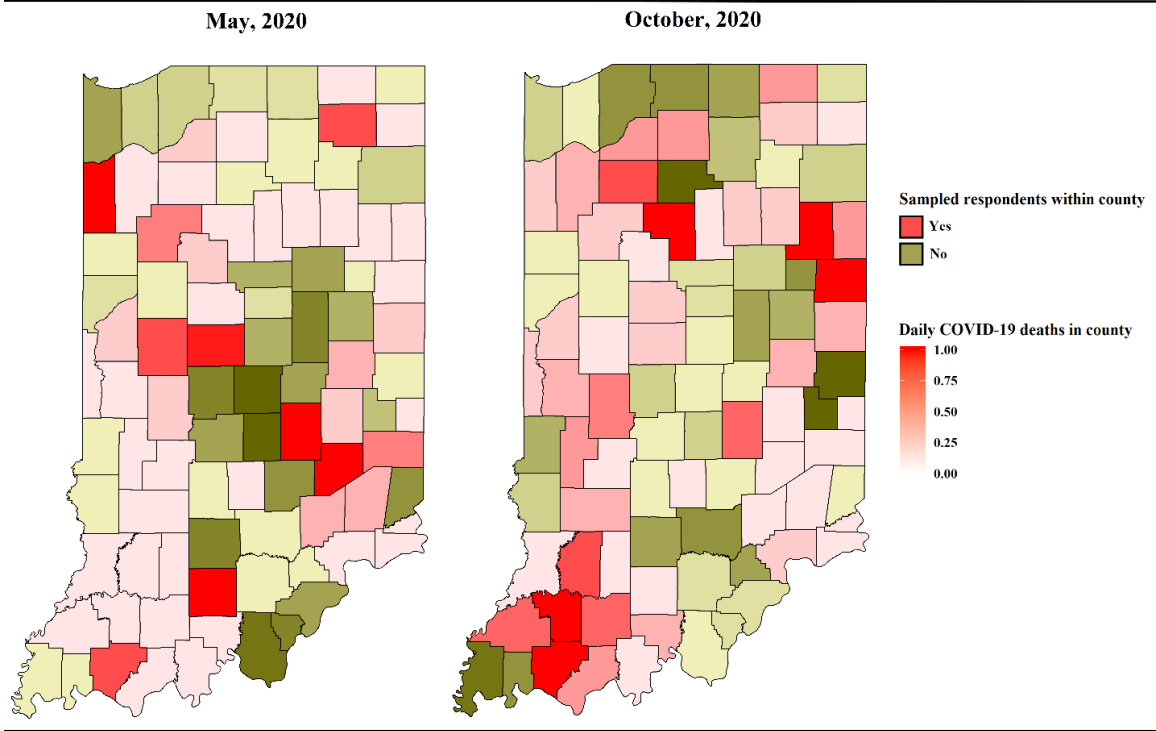

**Figure S2.** Geographic distribution of COVID-19 in Indiana during sample period and six months later

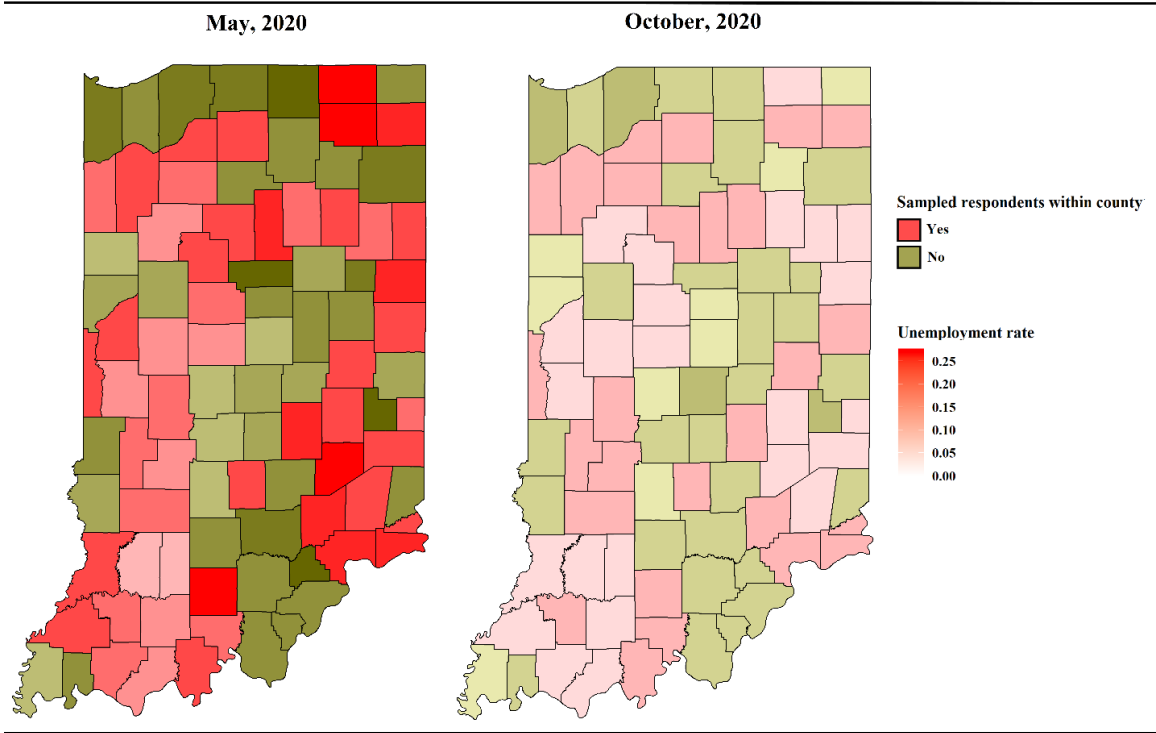

**Fig. S3.** Geographic distribution of unemployment in Indiana during sample period and six months later

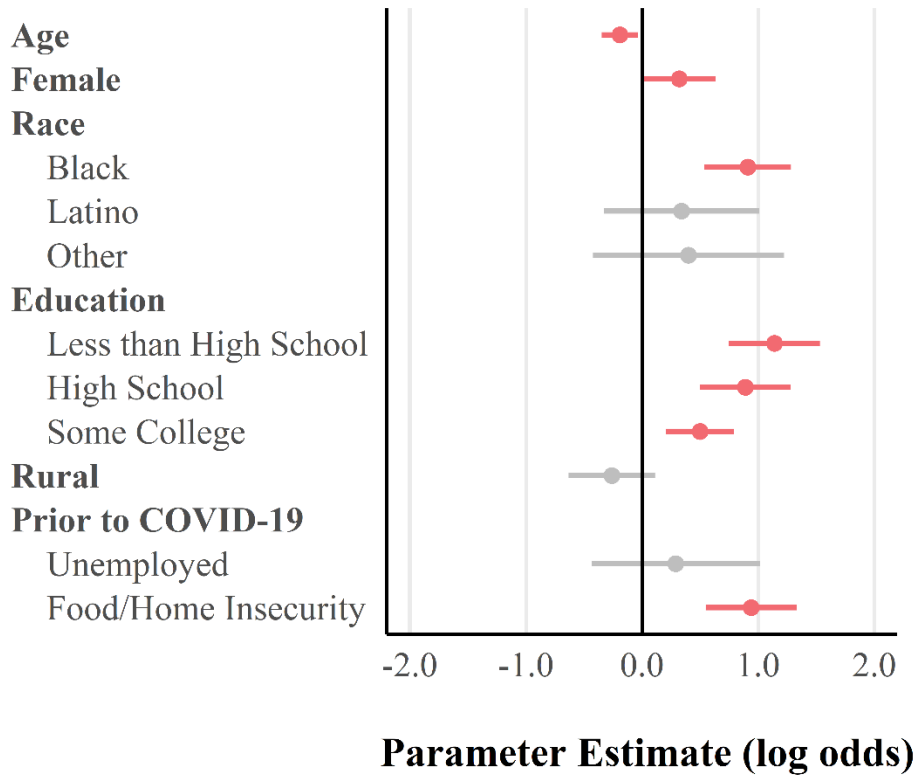

**Fig. S4.** Adjusted Parameter Estimates for Disparities in COVID-19 S2-S5Precarity, Person to Person Health Interview Survey (n=994)

Notes: Financial strain index (Chronbach's alpha = 0.76) based on each respondent's agreement to questions regarding their food, financial, and home insecurity. Dots represent parameter estimates and lines represent 95% confidence intervals. Colored dots indicate statistically significant parameter estimates; grey dots indicate non-significant parameter estimates. Model estimated with ordinal logistic regression. Model adjusted by sample weights and standard errors clustered by shared county. Race reference category = white. Education reference category = bachelors.

**Table S1.** COVID-19 context within sampled counties and entire state of Indiana

| <b>Population</b>             | <b>Daily Cases</b> | <b>Daily Deaths</b> | <b>Unemployed</b> |
|-------------------------------|--------------------|---------------------|-------------------|
| <i>3/28/2020 - 5/31/2020</i>  |                    |                     |                   |
| Indiana                       | 526                | 32                  | 14.40%            |
| Sample                        | 428                | 27                  | 14.44%            |
| <i>9/28/2020 - 10/31/2020</i> |                    |                     |                   |
| Indiana                       | 1,750              | 21                  | 5.83%             |
| Sample                        | 1,370              | 16                  | 6.18%             |

**Table S2.** COVID-19 has made me worry that I may not have a place to live (n=994)

| <b>Parameter</b>         | <b>Estimate</b> | <b>(se)</b> |     |
|--------------------------|-----------------|-------------|-----|
| <b>Age</b>               | 0.09            | (0.08)      |     |
| <b>Female</b>            | 0.26            | (0.12)      | *   |
| <b>Race</b>              |                 |             |     |
| Black                    | 0.33            | (0.33)      |     |
| Latino                   | 0.21            | (0.46)      |     |
| Other                    | 0.44            | (0.52)      |     |
| <b>Education</b>         |                 |             |     |
| Less than High School    | 1.14            | (0.25)      | *** |
| High School              | 1.19            | (0.29)      | *** |
| Some College             | 0.59            | (0.13)      | *** |
| <b>Rural</b>             | -0.22           | (0.20)      |     |
| <b>Prior to COVID-19</b> |                 |             |     |
| Unemployed               | 0.33            | (0.38)      |     |
| Food/Home Insecurity     | 0.63            | (0.22)      | **  |
| <b>Intercepts</b>        |                 |             |     |
| Threshold=1              | -0.19           | (0.11)      |     |
| Threshold=2              | 3.09            | (0.20)      | *** |
| Threshold=3              | 4.84            | (0.28)      | *** |
| $\chi^2$                 | 0.00            |             | *** |

Notes: Ordinal logistic regression model adjusted by sample weights and standard errors clustered by shared county. Race reference category = white. Education reference category = bachelors. Estimates reported in log odds.

**Table S3.** COVID-19 has made me worry that I may not have enough money to buy food (n=994)

| <b>Parameter</b>         | <b>Estimate</b> | <b>(se)</b> |     |
|--------------------------|-----------------|-------------|-----|
| <b>Age</b>               | -0.17           | (0.07)      | *   |
| <b>Female</b>            | 0.33            | (0.18)      |     |
| <b>Race</b>              |                 |             |     |
| Black                    | 1.23            | (0.23)      | *** |
| Latino                   | 0.02            | (0.47)      |     |
| Other                    | 0.29            | (0.39)      |     |
| <b>Education</b>         |                 |             |     |
| Less than High School    | 1.47            | (0.24)      | *** |
| High School              | 1.01            | (0.21)      | *** |
| Some College             | 0.76            | (0.21)      | *** |
| <b>Rural</b>             | -0.20           | (0.18)      |     |
| <b>Prior to COVID-19</b> |                 |             |     |
| Unemployed               | 0.24            | (0.40)      |     |
| Food/Home Insecurity     | 1.03            | (0.25)      | *** |
| <b>Intercepts</b>        |                 |             |     |
| Threshold=1              | -0.72           | (0.17)      | *** |
| Threshold=2              | 2.33            | (0.16)      | *** |
| Threshold=3              | 4.07            | (0.22)      | *** |
| $\chi^2$                 | 0.00            |             | *** |

Notes: Ordinal logistic regression model adjusted by sample weights and standard errors clustered by shared county. Race reference category = white. Education reference category = bachelors. Estimates reported in log odds.



**Table S4.** COVID-19 has made me worry about my finances, in general (n=994)

| <b>Parameter</b>         | <b>Estimate</b> | <b>(se)</b> |     |
|--------------------------|-----------------|-------------|-----|
| <b>Age</b>               | -0.29           | (0.08)      | *** |
| <b>Female</b>            | 0.38            | (0.17)      | *   |
| <b>Race</b>              |                 |             |     |
| Black                    | 0.50            | (0.14)      | *** |
| Latino                   | 0.64            | (0.20)      | **  |
| Other                    | 0.49            | (0.46)      |     |
| <b>Education</b>         |                 |             |     |
| Less than High School    | 0.53            | (0.26)      | *   |
| High School              | 0.39            | (0.18)      | *   |
| Some College             | 0.18            | (0.14)      |     |
| <b>Rural</b>             | -0.35           | (0.14)      | *   |
| <b>Prior to COVID-19</b> |                 |             |     |
| Unemployed               | 0.20            | (0.37)      |     |
| Food/Home Insecurity     | 0.78            | (0.19)      | *** |
| <b>Intercepts</b>        |                 |             |     |
| Threshold=1              | -1.99           | (0.20)      | *** |
| Threshold=2              | 0.50            | (0.14)      | *** |
| Threshold=3              | 2.71            | (0.16)      | *** |
| $\chi^2$                 | 0.00            |             | *** |

Notes: Ordinal logistic regression model adjusted by sample weights and standard errors clustered by shared county. Race reference category = white. Education reference category = bachelors. Estimates reported in log odds.

**Table S5.** I have been fired or laid off because of COVID-19 (n=994)

| <b>Parameter</b>         | <b>Estimate</b> | <b>(se)</b> |     |
|--------------------------|-----------------|-------------|-----|
| <b>Age</b>               | -0.85           | (0.22)      | *** |
| <b>Female</b>            | 0.59            | (0.34)      |     |
| <b>Race</b>              |                 |             |     |
| Black                    | 0.61            | (0.27)      | *   |
| Latino                   | -0.05           | (0.38)      |     |
| Other                    | -2.20           | (1.18)      |     |
| <b>Education</b>         |                 |             |     |
| Less than High School    | 1.06            | (0.45)      | *   |
| High School              | 0.23            | (0.35)      |     |
| Some College             | 0.96            | (0.37)      | **  |
| <b>Rural</b>             | -0.47           | (0.41)      |     |
| <b>Prior to COVID-19</b> |                 |             |     |
| Unemployed               | 1.47            | (0.35)      | *** |
| Food/Home Insecurity     | -0.21           | (0.27)      |     |
| <b>Constant</b>          | -3.67           | (0.38)      | *** |
| $\chi^2$                 | 0.00            |             | *** |

Notes: Logistic regression model adjusted by sample weights and standard errors clustered by shared county. Race reference category = white. Education reference category = bachelors. Estimates reported in log odds.
